# Supplementary material for: Access to family resources by families living with schizophrenia: a qualitative study of primary care workers in urban Beijing, China
Source: HighWire-hosted journal article supplement (doi:10.1136/bmjopen-2022-062675), 2022-09-01
Supplement: bmjopen-2022-062675supp001_data_supplement.pdf [file bmjopen-2022-062675supp001_data_supplement.pdf]

**Objectives:** Access to family resources by families of people living with schizophrenia from the perspective of primary care workers in urban Beijing

**Meeting Date:** September to December 2021, ranged from 30 to 90 minutes in length

**Recorder:** Two team members

**Location:** Meeting room

(The interviewer from the research team was experienced in qualitative research and had engaged in community management research of chronic diseases including schizophrenia for ten years. She directed the entire process of the interviews. Before interview, the interviewer introduced the value of the study to the participants. The procedures of the interview were as follows: (1) the interviewees who would like to participate in the study were contacted (2) After informed consent was obtained, the interviewer arranged a face-to-face interview alone with each them for approximately 30 min. (3) The sessions were recorded and transcribed verbatim; the true names of the interviewees were replaced by codes; and the privacy of the patients was well-preserved.)

### **Interview Guide**

1. Do you know about family resources?
2. Can you describe any ways for patients with schizophrenia to apply for family resources?
3. Can you describe any factors affect the use of family resources by patients with schizophrenia and their families?

Prompts: Can you describe these?

4. Are there any ways that would make it easier to use family resources by patients with schizophrenia and their families?

Prompts: Can you describe these?

5. Are there any ways in which you think can be more effective to use family resources for patients with schizophrenia?

6. Is it difficult for you to manage patients with schizophrenia in the community?

Prompts: Why?

How could this be done better?

7. Are there any things that would make it easier to manage patients with schizophrenia in the community?
